# Supplementary material for: Microarray-Based Genotyping and Clinical Outcomes of Staphylococcus aureus Bloodstream Infection: An Exploratory Study
Source: PLoS One. 2013 Aug 14;8(8):e71259. doi: 10.1371/journal.pone.0071259 (PMC3743874; doi:10.1371/journal.pone.0071259)
Supplement: File S2 — Complete hybridisation results for S. aureus strains examined in this study. Data are ordered by the assigned clonal complex and the strain designation. (PDF) [file pone.0071259.s002.pdf]

| Strain  | Clonal complex | agr group | spu-type | Ribos STAII | SPECIES MARKERS |      |     |          |     |     |              |               |                |               | REGULATORY GENES |      |      |  |  |  |  |  |  |  |
|---------|----------------|-----------|----------|-------------|-----------------|------|-----|----------|-----|-----|--------------|---------------|----------------|---------------|------------------|------|------|--|--|--|--|--|--|--|
|         |                |           |          |             | papA            | katA | Csa | proteinA | shl | nuc | agrI (total) | agrII (total) | agrIII (total) | agrIV (total) | sarA             | saeS | varS |  |  |  |  |  |  |  |
| MSA1495 | C1             | III       | 1273     | POS         | POS             | POS  | POS | POS      | POS | POS | NEG          | NEG           | NEG            | NEG           | POS              | POS  | POS  |  |  |  |  |  |  |  |
| MSA1491 | C1             | III       | 1271     | POS         | POS             | POS  | POS | POS      | POS | POS | NEG          | NEG           | NEG            | NEG           | POS              | POS  | POS  |  |  |  |  |  |  |  |
| MSA1493 | C1             | III       | 1272     | POS         | POS             | POS  | POS | POS      | POS | POS | NEG          | NEG           | NEG            | NEG           | POS              | POS  | POS  |  |  |  |  |  |  |  |
| MSA1494 | C1             | III       | 1284     | POS         | POS             | POS  | POS | POS      | POS | POS | NEG          | NEG           | NEG            | NEG           | POS              | POS  | POS  |  |  |  |  |  |  |  |
| MSA1496 | C1             | III       | 1177     | POS         | POS             | POS  | POS | POS      | POS | POS | NEG          | NEG           | NEG            | NEG           | POS              | POS  | POS  |  |  |  |  |  |  |  |
| MSA1499 | C1             | III       | 1179     | POS         | POS             | POS  | POS | POS      | POS | POS | NEG          | NEG           | NEG            | NEG           | POS              | POS  | POS  |  |  |  |  |  |  |  |
| MSA1500 | C1             | III       | 1187     | POS         | POS             | POS  | POS | POS      | POS | POS | NEG          | NEG           | NEG            | NEG           | POS              | POS  | POS  |  |  |  |  |  |  |  |
| MSA1501 | C1             | III       | 1187     | POS         | POS             | POS  | POS | POS      | POS | POS | NEG          | NEG           | NEG            | NEG           | POS              | POS  | POS  |  |  |  |  |  |  |  |
| MSA1502 | C1             | III       | 1127     | POS         | POS             | POS  | POS | POS      | POS | POS | NEG          | NEG           | NEG            | NEG           | POS              | POS  | POS  |  |  |  |  |  |  |  |
| MSA1479 | C1             | III       | 1275     | POS         | POS             | POS  | POS | POS      | POS | POS | NEG          | NEG           | NEG            | NEG           | POS              | POS  | POS  |  |  |  |  |  |  |  |
| MSA1768 | C5             | II        | 4001     | POS         | POS             | POS  | POS | POS      | POS | POS | NEG          | NEG           | NEG            | NEG           | POS              | POS  | POS  |  |  |  |  |  |  |  |
| MSA1769 | C5             | II        | 4001     | POS         | POS             | POS  | POS | POS      | POS | POS | NEG          | NEG           | NEG            | NEG           | POS              | POS  | POS  |  |  |  |  |  |  |  |
| MSA1800 | C5             | II        | 4003     | POS         | POS             | POS  | POS | POS      | POS | POS | NEG          | NEG           | NEG            | NEG           | POS              | POS  | POS  |  |  |  |  |  |  |  |
| MSA1801 | C5             | II        | 4003     | POS         | POS             | POS  | POS | POS      | POS | POS | NEG          | NEG           | NEG            | NEG           | POS              | POS  | POS  |  |  |  |  |  |  |  |
| MSA1804 | C5             | II        | 4004     | POS         | POS             | POS  | POS | POS      | POS | POS | NEG          | NEG           | NEG            | NEG           | POS              | POS  | POS  |  |  |  |  |  |  |  |
| MSA1806 | C5             | II        | 4003     | POS         | POS             | POS  | POS | POS      | POS | POS | NEG          | NEG           | NEG            | NEG           | POS              | POS  | POS  |  |  |  |  |  |  |  |
| MSA1809 | C5             | II        | 4003     | POS         | POS             | POS  | POS | POS      | POS | POS | NEG          | NEG           | NEG            | NEG           | POS              | POS  | POS  |  |  |  |  |  |  |  |
| MSA1810 | C5             | II        | 4003     | POS         | POS             | POS  | POS | POS      | POS | POS | NEG          | NEG           | NEG            | NEG           | POS              | POS  | POS  |  |  |  |  |  |  |  |
| MSA1826 | C4             | II        | 4002     | POS         | POS             | POS  | POS | POS      | POS | POS | NEG          | NEG           | NEG            | NEG           | POS              | POS  | POS  |  |  |  |  |  |  |  |
| MSA1828 | C4             | II        | 4002     | POS         | POS             | POS  | POS | POS      | POS | POS | NEG          | NEG           | NEG            | NEG           | POS              | POS  | POS  |  |  |  |  |  |  |  |
| MSA1829 | C4             | II        | 4002     | POS         | POS             | POS  | POS | POS      | POS | POS | NEG          | NEG           | NEG            | NEG           | POS              | POS  | POS  |  |  |  |  |  |  |  |
| MSA1866 | C5             | II        | 4002     | POS         | POS             | POS  | POS | POS      | POS | POS | NEG          | NEG           | NEG            | NEG           | POS              | POS  | POS  |  |  |  |  |  |  |  |
| MSA1868 | C5             | II        | 4002     | POS         | POS             | POS  | POS | POS      | POS | POS | NEG          | NEG           | NEG            | NEG           | POS              | POS  | POS  |  |  |  |  |  |  |  |
| MSA1925 | C5             | II        | 4002     | POS         | POS             | POS  | POS | POS      | POS | POS | NEG          | NEG           | NEG            | NEG           | POS              | POS  | POS  |  |  |  |  |  |  |  |
| MSA1926 | C5             | II        | 4002     | POS         | POS             | POS  | POS | POS      | POS | POS | NEG          | NEG           | NEG            | NEG           | POS              | POS  | POS  |  |  |  |  |  |  |  |
| MSA1927 | C5             | II        | 4002     | POS         | POS             | POS  | POS | POS      | POS | POS | NEG          | NEG           | NEG            | NEG           | POS              | POS  | POS  |  |  |  |  |  |  |  |
| MSA1928 | C5             | II        | 4002     | POS         | POS             | POS  | POS | POS      | POS | POS | NEG          | NEG           | NEG            | NEG           | POS              | POS  | POS  |  |  |  |  |  |  |  |
| MSA1930 | C5             | II        | 4003     | POS         | POS             | POS  | POS | POS      | POS | POS | NEG          | NEG           | NEG            | NEG           | POS              | POS  | POS  |  |  |  |  |  |  |  |
| MSA1931 | C5             | II        | 4045     | POS         | POS             | POS  | POS | POS      | POS | POS | NEG          | NEG           | NEG            | NEG           | POS              | POS  | POS  |  |  |  |  |  |  |  |
| MSA1436 | C1             | II        | 4001     | POS         | POS             | POS  | POS | POS      | POS | POS | NEG          | NEG           | NEG            | NEG           | POS              | POS  | POS  |  |  |  |  |  |  |  |
| MSA1437 | C1             | II        | 4001     | POS         | POS             | POS  | POS | POS      | POS | POS | NEG          | NEG           | NEG            | NEG           | POS              | POS  | POS  |  |  |  |  |  |  |  |
| MSA1420 | C1             | II        | 4001     | POS         | POS             | POS  | POS | POS      | POS | POS | NEG          | NEG           | NEG            | NEG           | POS              | POS  | POS  |  |  |  |  |  |  |  |
| MSA1421 | C1             | II        | 4001     | POS         | POS             | POS  | POS | POS      | POS | POS | NEG          | NEG           | NEG            | NEG           | POS              | POS  | POS  |  |  |  |  |  |  |  |
| MSA1422 | C1             | II        | 4001     | POS         | POS             | POS  | POS | POS      | POS | POS | NEG          | NEG           | NEG            | NEG           | POS              | POS  | POS  |  |  |  |  |  |  |  |
| MSA1423 | C1             | II        | 4001     | POS         | POS             | POS  | POS | POS      | POS | POS | NEG          | NEG           | NEG            | NEG           | POS              | POS  | POS  |  |  |  |  |  |  |  |
| MSA1424 | C1             | II        | 4001     | POS         | POS             | POS  | POS | POS      | POS | POS | NEG          | NEG           | NEG            | NEG           | POS              | POS  | POS  |  |  |  |  |  |  |  |
| MSA1425 | C1             | II        | 4001     | POS         | POS             | POS  | POS | POS      | POS | POS | NEG          | NEG           | NEG            | NEG           | POS              | POS  | POS  |  |  |  |  |  |  |  |
| MSA1426 | C1             | II        | 4001     | POS         | POS             | POS  | POS | POS      | POS | POS | NEG          | NEG           | NEG            | NEG           | POS              | POS  | POS  |  |  |  |  |  |  |  |
| MSA1427 | C1             | II        | 4001     | POS         | POS             | POS  | POS | POS      | POS | POS | NEG          | NEG           | NEG            | NEG           | POS              | POS  | POS  |  |  |  |  |  |  |  |
| MSA1428 | C1             | II        | 4001     | POS         | POS             | POS  | POS | POS      | POS | POS | NEG          | NEG           | NEG            | NEG           | POS              | POS  | POS  |  |  |  |  |  |  |  |
| MSA1429 | C1             | II        | 4001     | POS         | POS             | POS  | POS | POS      | POS | POS | NEG          | NEG           | NEG            | NEG           | POS              | POS  | POS  |  |  |  |  |  |  |  |
| MSA1430 | C1             | II        | 4001     | POS         | POS             | POS  | POS | POS      | POS | POS | NEG          | NEG           | NEG            | NEG           | POS              | POS  | POS  |  |  |  |  |  |  |  |
| MSA1431 | C1             | II        | 4001     | POS         | POS             | POS  | POS | POS      | POS | POS | NEG          | NEG           | NEG            | NEG           | POS              | POS  | POS  |  |  |  |  |  |  |  |
| MSA1432 | C1             | II        | 4001     | POS         | POS             | POS  | POS | POS      | POS | POS | NEG          | NEG           | NEG            | NEG           | POS              | POS  | POS  |  |  |  |  |  |  |  |
| MSA1433 | C1             | II        | 4001     | POS         | POS             | POS  | POS | POS      | POS | POS | NEG          | NEG           | NEG            | NEG           | POS              | POS  | POS  |  |  |  |  |  |  |  |
| MSA1434 | C1             | II        | 4001     | POS         | POS             | POS  | POS | POS      | POS | POS | NEG          | NEG           | NEG            | NEG           | POS              | POS  | POS  |  |  |  |  |  |  |  |
| MSA1435 | C1             | II        | 4001     | POS         | POS             | POS  | POS | POS      | POS | POS | NEG          | NEG           | NEG            | NEG           | POS              | POS  | POS  |  |  |  |  |  |  |  |
| MSA1436 | C1             | II        | 4001     | POS         | POS             | POS  | POS | POS      | POS | POS | NEG          | NEG           | NEG            | NEG           | POS              | POS  | POS  |  |  |  |  |  |  |  |
| MSA1437 | C1             | II        | 4001     | POS         | POS             | POS  | POS | POS      | POS | POS | NEG          | NEG           | NEG            | NEG           | POS              | POS  | POS  |  |  |  |  |  |  |  |
| MSA1438 | C1             | II        | 4001     | POS         | POS             | POS  | POS | POS      | POS | POS | NEG          | NEG           | NEG            | NEG           | POS              | POS  | POS  |  |  |  |  |  |  |  |
| MSA1439 | C1             | II        | 4001     | POS         | POS             | POS  | POS | POS      | POS | POS | NEG          | NEG           | NEG            | NEG           | POS              | POS  | POS  |  |  |  |  |  |  |  |
| MSA1440 | C1             | II        | 4001     | POS         | POS             | POS  | POS | POS      | POS | POS | NEG          | NEG           | NEG            | NEG           | POS              | POS  | POS  |  |  |  |  |  |  |  |
| MSA1441 | C1             | II        | 4001     | POS         | POS             | POS  | POS | POS      | POS | POS | NEG          | NEG           | NEG            | NEG           | POS              | POS  | POS  |  |  |  |  |  |  |  |
| MSA1442 | C1             | II        | 4001     | POS         | POS             | POS  | POS | POS      | POS | POS | NEG          | NEG           | NEG            | NEG           | POS              | POS  | POS  |  |  |  |  |  |  |  |
| MSA1443 | C1             | II        | 4001     | POS         | POS             | POS  | POS | POS      | POS | POS | NEG          | NEG           | NEG            | NEG           | POS              | POS  | POS  |  |  |  |  |  |  |  |
| MSA1444 | C1             | II        | 4001     | POS         | POS             | POS  | POS | POS      | POS | POS | NEG          | NEG           | NEG            | NEG           | POS              | POS  | POS  |  |  |  |  |  |  |  |
| MSA1445 | C1             | II        | 4001     | POS         | POS             | POS  | POS | POS      | POS | POS | NEG          | NEG           | NEG            | NEG           | POS              | POS  | POS  |  |  |  |  |  |  |  |
| MSA1446 | C1             | II        | 4001     | POS         | POS             | POS  | POS | POS      | POS | POS | NEG          | NEG           | NEG            | NEG           | POS              | POS  | POS  |  |  |  |  |  |  |  |
| MSA1447 | C1             | II        | 4001     | POS         | POS             | POS  | POS | POS      | POS | POS | NEG          | NEG           | NEG            | NEG           | POS              | POS  | POS  |  |  |  |  |  |  |  |
| MSA1448 | C1             | II        | 4001     | POS         | POS             | POS  | POS | POS      | POS | POS | NEG          | NEG           | NEG            | NEG           | POS              | POS  | POS  |  |  |  |  |  |  |  |
| MSA1449 | C1             | II        | 4001     | POS         | POS             | POS  | POS | POS      | POS | POS | NEG          | NEG           | NEG            | NEG           | POS              | POS  | POS  |  |  |  |  |  |  |  |
| MSA1450 | C1             | II        | 4001     | POS         | POS             | POS  | POS | POS      | POS | POS | NEG          | NEG           | NEG            | NEG           | POS              | POS  | POS  |  |  |  |  |  |  |  |
| MSA1451 | C1             | II        | 4001     | POS         | POS             | POS  | POS | POS      | POS | POS | NEG          | NEG           | NEG            | NEG           | POS              | POS  | POS  |  |  |  |  |  |  |  |
| MSA1452 | C1             | II        | 4001     | POS         | POS             | POS  | POS | POS      | POS | POS | NEG          | NEG           | NEG            | NEG           | POS              | POS  | POS  |  |  |  |  |  |  |  |
| MSA1453 | C1             | II        | 4001     | POS         | POS             | POS  | POS | POS      | POS | POS | NEG          | NEG           | NEG            | NEG           | POS              | POS  | POS  |  |  |  |  |  |  |  |
| MSA1454 | C1             | II        | 4001     | POS         | POS             | POS  | POS | POS      | POS | POS | NEG          | NEG           | NEG            | NEG           | POS              | POS  | POS  |  |  |  |  |  |  |  |
| MSA1455 | C1             | II        | 4001     | POS         | POS             | POS  | POS | POS      | POS | POS | NEG          | NEG           | NEG            | NEG           | POS              | POS  | POS  |  |  |  |  |  |  |  |
| MSA1456 | C1             | II        | 4001     | POS         | POS             | POS  | POS | POS      | POS | POS | NEG          | NEG           | NEG            | NEG           | POS              | POS  | POS  |  |  |  |  |  |  |  |
| MSA1457 | C1             | II        | 4001     | POS         | POS             | POS  | POS | POS      | POS | POS | NEG          | NEG           | NEG            | NEG           | POS              | POS  | POS  |  |  |  |  |  |  |  |
| MSA1458 | C1             | II        | 4001     | POS         | POS             | POS  | POS | POS      | POS | POS | NEG          | NEG           | NEG            | NEG           | POS              | POS  | POS  |  |  |  |  |  |  |  |
| MSA1459 | C1             | II        | 4001     | POS         | POS             | POS  | POS | POS      | POS | POS | NEG          | NEG           | NEG            | NEG           | POS              | POS  | POS  |  |  |  |  |  |  |  |
| MSA1460 | C1             | II        | 4001     | POS         | POS             | POS  | POS | POS      | POS | POS | NEG          | NEG           | NEG            | NEG           | POS              | POS  | POS  |  |  |  |  |  |  |  |
| MSA1461 | C1             | II        | 4001     | POS         | POS             | POS  | POS | POS      | POS | POS | NEG          | NEG           | NEG            | NEG           | POS              | POS  | POS  |  |  |  |  |  |  |  |
| MSA1462 | C1             | II        | 4001     | POS         | POS             | POS  | POS | POS      | POS | POS | NEG          | NEG           | NEG            | NEG           | POS              | POS  | POS  |  |  |  |  |  |  |  |
| MSA1463 | C1             | II        | 4001     | POS         | POS             | POS  | POS | POS      | POS | POS | NEG          | NEG           | NEG            | NEG           | POS              | POS  | POS  |  |  |  |  |  |  |  |
| MSA1464 | C1             | II        | 4001     | POS         | POS             | POS  | POS | POS      | POS | POS | NEG          | NEG           | NEG            | NEG           | POS              | POS  | POS  |  |  |  |  |  |  |  |
| MSA1465 | C1             | II        | 4001     | POS         | POS             | POS  | POS | POS      | POS | POS | NEG          | NEG           | NEG            | NEG           | POS              | POS  | POS  |  |  |  |  |  |  |  |
| MSA1466 | C1             | II        | 4001     | POS         | POS             | POS  | POS | POS      | POS | POS | NEG          | NEG           | NEG            | NEG           | POS              | POS  | POS  |  |  |  |  |  |  |  |
| MSA1467 | C1             | II        | 4001     | POS         | POS             | POS  | POS | POS      | POS | POS | NEG          | NEG           | NEG            | NEG           | POS              | POS  | POS  |  |  |  |  |  |  |  |
| MSA1468 | C1             | II        | 4001     | POS         | POS             | POS  | POS | POS      | POS | POS | NEG          | NEG           | NEG            | NEG           | POS              | POS  | POS  |  |  |  |  |  |  |  |
| MSA1469 | C1             | II        | 4001     | POS         | POS             | POS  | POS | POS      | POS | POS | NEG          | NEG           | NEG            | NEG           | POS              | POS  | POS  |  |  |  |  |  |  |  |
| MSA1470 | C1             | II        | 4001     | POS         | POS             | POS  | POS | POS      | POS | POS | NEG          | NEG           | NEG            | NEG           | POS              | POS  | POS  |  |  |  |  |  |  |  |
| MSA1471 | C1             | II        | 4001     | POS         | POS             | POS  | POS | POS      | POS | POS | NEG          | NEG           | NEG            | NEG           | POS              | POS  | POS  |  |  |  |  |  |  |  |
| MSA1472 | C1             | II        | 4001     | POS         | POS             | POS  | POS | POS      | POS | POS | NEG          | NEG           | NEG            | NEG           | POS              | POS  | POS  |  |  |  |  |  |  |  |
| MSA1473 | C1             | II        | 4001     | POS         | POS             | POS  | POS | POS      | POS | POS | NEG          | NEG           | NEG            | NEG           | POS              | POS  | POS  |  |  |  |  |  |  |  |
| MSA1474 | C1             | II        | 4001     | POS         | POS             | POS  | POS | POS      | POS | POS | NEG          | NEG           | NEG            | NEG           | POS              | POS  | POS  |  |  |  |  |  |  |  |
| MSA1475 | C1             | II        | 4001     | POS         | POS             | POS  | POS | POS      | POS | POS | NEG          | NEG           | NEG            | NEG           | POS              | POS  | POS  |  |  |  |  |  |  |  |
| MSA1476 | C1             | II        | 4001     | POS         | POS             | POS  | POS | POS      | POS | POS | NEG          | NEG           | NEG            | NEG           | POS              | POS  | POS  |  |  |  |  |  |  |  |
| MSA1477 | C1             | II        | 4001     | POS         | POS             | POS  | POS | POS      | POS | POS | NEG          | NEG           | NEG            | NEG           | POS              | POS  | POS  |  |  |  |  |  |  |  |
| MSA1478 | C1             | II        | 4001     | POS         | POS             | POS  | POS | POS      | POS | POS | NEG          | NEG           | NEG            | NEG           | POS              | POS  | POS  |  |  |  |  |  |  |  |
| MSA1479 | C1             | II        | 4001     | POS         | POS             | POS  | POS | POS      | POS | POS | NEG          | NEG           | NEG            | NEG           | POS              | POS  | POS  |  |  |  |  |  |  |  |
| MSA1480 | C1             | II        | 4001     | POS         | POS             | POS  | POS | POS      | POS | POS | NEG          | NEG           | NEG            | NEG           | POS              | POS  | POS  |  |  |  |  |  |  |  |
| MSA1481 | C1             | II        | 4001     | POS         | POS             | POS  | POS | POS      | POS | POS | NEG          | NEG           | NEG            | NEG           | POS              | POS  | POS  |  |  |  |  |  |  |  |
| MSA1482 | C1             | II        | 4001     | POS         | POS             | POS  | POS | POS      | POS | POS | NEG          | NEG           | NEG            | NEG           | POS              | POS  | POS  |  |  |  |  |  |  |  |
| MSA1483 | C1             | II        | 4001     | POS         | POS             | POS  | POS | POS      | POS | POS | NEG          | NEG           | NEG            | NEG           | POS              | POS  | POS  |  |  |  |  |  |  |  |
| MSA1484 | C1             | II        | 4001     | POS         | POS             | POS  | POS | POS      | POS | POS | NEG          | NEG           | NEG            | NEG           | POS              | POS  | POS  |  |  |  |  |  |  |  |
| MSA1485 | C1             | II        | 4001     | POS         | POS             | POS  | POS | POS      | POS | POS | NEG          | NEG           | NEG            | NEG           | POS              | POS  | POS  |  |  |  |  |  |  |  |
| MSA1486 | C1             | II        | 4001     | POS         | POS             | POS  | POS | POS      | POS | POS | NEG          | NEG           | NEG            | NEG           | POS              | POS  | POS  |  |  |  |  |  |  |  |
| MSA1487 | C1             | II        | 4001     | POS         | POS             | POS  | POS | POS      | POS | POS | NEG          | NEG           | NEG            | NEG           | POS              | POS  | POS  |  |  |  |  |  |  |  |
| MSA1488 | C1             | II        | 4001     | POS         | POS             | POS  | POS | POS      | POS | POS | NEG          | NEG           | NEG            | NEG           | POS              | POS  | POS  |  |  |  |  |  |  |  |
| MSA1489 | C1             | II        | 4001     | POS         | POS             | POS  | POS | POS      | POS | POS | NEG          | NEG           | NEG            | NEG           | POS              | POS  | POS  |  |  |  |  |  |  |  |
| MSA1490 | C1             | II        | 4001     | POS         | POS             | POS  | POS | POS      | POS | POS |              |               |                |               |                  |      |      |  |  |  |  |  |  |  |





[illegible]





| Strain | RESISTANCE: MLS-ANTIBIOTICS |        |        |        |        |                   |                   |        |        |        | RESISTANCE: AMINOGLYCOSIDES |        |        |     |                   |        |          |
|--------|-----------------------------|--------|--------|--------|--------|-------------------|-------------------|--------|--------|--------|-----------------------------|--------|--------|-----|-------------------|--------|----------|
|        | erm(A)                      | erm(B) | erm(C) | htr(A) | mtr(A) | mef(A)<br>+mef(B) | mef(A)<br>+mef(B) | mph(C) | mph(C) | vat(A) | vat(B)                      | yga(A) | yga(A) | ygb | aph(A)<br>+aph(B) | aad(B) | aph(A-3) |
| MSA105 | NRG                         | NRG    | NRG    | NRG    | NRG    | NRG               | NRG               | NRG    | NRG    | NRG    | NRG                         | NRG    | NRG    | NRG | NRG               | NRG    | NRG      |
| MSA181 | NRG                         | NRG    | NRG    | NRG    | NRG    | NRG               | NRG               | NRG    | NRG    | NRG    | NRG                         | NRG    | NRG    | NRG | NRG               | NRG    | NRG      |
| MSA187 | NRG                         | NRG    | PTG    | NRG    | NRG    | NRG               | NRG               | NRG    | NRG    | NRG    | NRG                         | NRG    | NRG    | NRG | NRG               | NRG    | NRG      |
| MSA204 | NRG                         | NRG    | NRG    | NRG    | NRG    | NRG               | NRG               | NRG    | NRG    | NRG    | NRG                         | NRG    | NRG    | NRG | NRG               | NRG    | NRG      |
| MSA236 | NRG                         | NRG    | NRG    | NRG    | NRG    | NRG               | NRG               | NRG    | NRG    | NRG    | NRG                         | NRG    | NRG    | NRG | NRG               | NRG    | NRG      |
| MSA239 | NRG                         | NRG    | NRG    | NRG    | NRG    | NRG               | NRG               | NRG    | NRG    | NRG    | NRG                         | NRG    | NRG    | NRG | NRG               | NRG    | NRG      |
| MSA265 | NRG                         | NRG    | NRG    | NRG    | NRG    | NRG               | NRG               | NRG    | NRG    | NRG    | NRG                         | NRG    | NRG    | NRG | NRG               | NRG    | NRG      |
| MSA270 | NRG                         | NRG    | NRG    | NRG    | NRG    | NRG               | NRG               | NRG    | NRG    | NRG    | NRG                         | NRG    | NRG    | NRG | NRG               | NRG    | NRG      |
| MSA320 | PTG                         | NRG    | NRG    | NRG    | NRG    | NRG               | NRG               | NRG    | NRG    | NRG    | NRG                         | NRG    | NRG    | NRG | NRG               | NRG    | NRG      |
| MSA329 | NRG                         | NRG    | NRG    | NRG    | NRG    | NRG               | NRG               | NRG    | NRG    | NRG    | NRG                         | NRG    | NRG    | NRG | NRG               | NRG    | PTG      |
| MSA378 | PTG                         | NRG    | NRG    | NRG    | NRG    | NRG               | NRG               | NRG    | NRG    | NRG    | NRG                         | NRG    | NRG    | NRG | NRG               | NRG    | PTG      |
| MSA379 | NRG                         | NRG    | NRG    | NRG    | NRG    | NRG               | NRG               | NRG    | NRG    | NRG    | NRG                         | NRG    | NRG    | NRG | NRG               | NRG    | PTG      |
| MSA380 | NRG                         | NRG    | NRG    | NRG    | NRG    | NRG               | NRG               | NRG    | NRG    | NRG    | NRG                         | NRG    | NRG    | NRG | NRG               | NRG    | PTG      |
| MSA431 | PTG                         | NRG    | NRG    | NRG    | NRG    | NRG               | NRG               | NRG    | NRG    | NRG    | NRG                         | NRG    | NRG    | NRG | NRG               | NRG    | PTG      |
| MSA464 | NRG                         | NRG    | NRG    | NRG    | NRG    | NRG               | NRG               | NRG    | NRG    | NRG    | NRG                         | NRG    | NRG    | NRG | NRG               | NRG    | PTG      |
| MSA490 | PTG                         | NRG    | NRG    | NRG    | NRG    | NRG               | NRG               | NRG    | NRG    | NRG    | NRG                         | NRG    | NRG    | NRG | NRG               | NRG    | PTG      |
| MSA496 | NRG                         | NRG    | NRG    | NRG    | NRG    | NRG               | NRG               | NRG    | NRG    | NRG    | NRG                         | NRG    | NRG    | NRG | NRG               | NRG    | PTG      |
| MSA502 | PTG                         | NRG    | PTG    | NRG    | NRG    | NRG               | NRG               | NRG    | NRG    | NRG    | NRG                         | NRG    | NRG    | NRG | NRG               | NRG    | NRG      |
| MSA505 | NRG                         | NRG    | NRG    | NRG    | NRG    | NRG               | NRG               | NRG    | NRG    | NRG    | NRG                         | NRG    | NRG    | NRG | NRG               | NRG    | NRG      |
| MSA566 | NRG                         | NRG    | NRG    | NRG    | NRG    | NRG               | NRG               | NRG    | NRG    | NRG    | NRG                         | NRG    | NRG    | NRG | NRG               | NRG    | PTG      |
| MSA578 | PTG                         | NRG    | NRG    | NRG    | NRG    | NRG               | NRG               | NRG    | NRG    | NRG    | NRG                         | NRG    | NRG    | NRG | NRG               | NRG    | NRG      |
| MSA579 | NRG                         | NRG    | NRG    | NRG    | NRG    | NRG               | NRG               | NRG    | NRG    | NRG    | NRG                         | NRG    | NRG    | NRG | NRG               | NRG    | PTG      |
| MSA580 | PTG                         | NRG    | NRG    | NRG    | NRG    | NRG               | NRG               | NRG    | NRG    | NRG    | NRG                         | NRG    | NRG    | NRG | NRG               | NRG    | PTG      |
| MSA581 | PTG                         | NRG    | NRG    | NRG    | NRG    | NRG               | NRG               | NRG    | NRG    | NRG    | NRG                         | NRG    | NRG    | NRG | NRG               | NRG    | PTG      |
| MSA582 | PTG                         | NRG    | NRG    | NRG    | NRG    | NRG               | NRG               | NRG    | NRG    | NRG    | NRG                         | NRG    | NRG    | NRG | NRG               | NRG    | PTG      |
| MSA583 | PTG                         | NRG    | NRG    | NRG    | NRG    | NRG               | NRG               | NRG    | NRG    | NRG    | NRG                         | NRG    | NRG    | NRG | NRG               | NRG    | PTG      |
| MSA584 | PTG                         | NRG    | NRG    | NRG    | NRG    | NRG               | NRG               | NRG    | NRG    | NRG    | NRG                         | NRG    | NRG    | NRG | NRG               | NRG    | PTG      |
| MSA585 | PTG                         | NRG    | NRG    | NRG    | NRG    | NRG               | NRG               | NRG    | NRG    | NRG    | NRG                         | NRG    | NRG    | NRG | NRG               | NRG    | PTG      |
| MSA586 | PTG                         | NRG    | NRG    | NRG    | NRG    | NRG               | NRG               | NRG    | NRG    | NRG    | NRG                         | NRG    | NRG    | NRG | NRG               | NRG    | PTG      |
| MSA587 | PTG                         | NRG    | NRG    | NRG    |        |                   |                   |        |        |        |                             |        |        |     |                   |        |          |

[illegible]



[illegible]

[illegible]

[illegible]

[illegible]

[illegible]









| VIRULENCE: ACME LOCUS |          |          |          |          |            | VIRULENCE: PROTEASES |          |      |      |      |      |               |      |               |      |
|-----------------------|----------|----------|----------|----------|------------|----------------------|----------|------|------|------|------|---------------|------|---------------|------|
| Strain                | arcA-SCC | arcB-SCC | arcC-SCC | arcD-SCC | aar (cont) | aar (non cont)       | arc-ORF2 | optA | optB | optE | ospA | ospB<br>cont. | ospB | ospP<br>cont. | ospP |
| MSEA195               | NRG      | NRG      | NRG      | NRG      | PJG        | PJG                  | PJG      | PJG  | PJG  | PJG  | PJG  | PJG           | PJG  | PJG           | PJG  |
| MSEA821               | NRG      | NRG      | NRG      | NRG      | PJG        | PJG                  | PJG      | PJG  | PJG  | PJG  | PJG  | PJG           | PJG  | PJG           | PJG  |
| MSEA187               | NRG      | NRG      | NRG      | NRG      | PJG        | PJG                  | NRG      | PJG  | PJG  | PJG  | PJG  | PJG           | PJG  | PJG           | PJG  |
| MSEA244               | NRG      | NRG      | NRG      | NRG      | PJG        | PJG                  | PJG      | PJG  | PJG  | PJG  | PJG  | PJG           | PJG  | PJG           | PJG  |
| MSEA246               | NRG      | NRG      | NRG      | NRG      | PJG        | PJG                  | PJG      | PJG  | PJG  | PJG  | PJG  | PJG           | PJG  | PJG           | PJG  |
| MSEA309               | NRG      | NRG      | NRG      | NRG      | PJG        | PJG                  | PJG      | PJG  | PJG  | PJG  | PJG  | PJG           | PJG  | PJG           | PJG  |
| MSEA326               | NRG      | NRG      | NRG      | NRG      | PJG        | PJG                  | PJG      | PJG  | PJG  | PJG  | PJG  | PJG           | PJG  | PJG           | PJG  |
| MSEA328               | NRG      | NRG      | NRG      | NRG      | PJG        | PJG                  | PJG      | PJG  | PJG  | PJG  | PJG  | PJG           | PJG  | PJG           | PJG  |
| MSEA329               | NRG      | NRG      | NRG      | NRG      | PJG        | PJG                  | NRG      | PJG  | PJG  | PJG  | PJG  | PJG           | PJG  | PJG           | PJG  |
| MSEA78                | NRG      | NRG      | NRG      | NRG      | PJG        | PJG                  | PJG      | PJG  | PJG  | NRG  | PJG  | PJG           | PJG  | PJG           | PJG  |
| MSEA278               | NRG      | NRG      | NRG      | NRG      | PJG        | PJG                  | PJG      | PJG  | PJG  | PJG  | PJG  | PJG           | PJG  | PJG           | PJG  |
| MSEA380               | NRG      | NRG      | NRG      | NRG      | PJG        | PJG                  | PJG      | PJG  | PJG  | NRG  | PJG  | PJG           | PJG  | PJG           | PJG  |
| MSEA381               | NRG      | NRG      | NRG      | NRG      | PJG        | PJG                  | PJG      | PJG  | PJG  | NRG  | PJG  | PJG           | PJG  | PJG           | PJG  |
| MSEA382               | NRG      | NRG      | NRG      | NRG      | PJG        | PJG                  | PJG      | PJG  | PJG  | NRG  | PJG  | PJG           | PJG  | PJG           | PJG  |
| MSEA383               | NRG      | NRG      | NRG      | NRG      | PJG        | PJG                  | PJG      | PJG  | PJG  | NRG  | PJG  | PJG           | PJG  | PJG           | PJG  |
| MSEA384               | NRG      | NRG      | NRG      | NRG      | PJG        | PJG                  | PJG      | PJG  | PJG  | NRG  | PJG  | PJG           | PJG  | PJG           | PJG  |
| MSEA385               | NRG      | NRG      | NRG      | NRG      | PJG        | PJG                  | PJG      | PJG  | PJG  | NRG  | PJG  | PJG           | PJG  | PJG           | PJG  |
| MSEA292               | NRG      | NRG      | NRG      | NRG      | PJG        | PJG                  | PJG      | PJG  | PJG  | NRG  | PJG  | PJG           | PJG  | PJG           | PJG  |
| MSEA293               | NRG      | NRG      | NRG      | NRG      | PJG        | PJG                  | PJG      | PJG  | PJG  | NRG  | PJG  | PJG           | PJG  | PJG           | PJG  |
| MSEA294               | NRG      | NRG      | NRG      | NRG      | PJG        | PJG                  | PJG      | PJG  | PJG  | NRG  | PJG  | PJG           | PJG  | PJG           | PJG  |
| MSEA295               | NRG      | NRG      | NRG      | NRG      | PJG        | PJG                  | PJG      | PJG  | PJG  | NRG  | PJG  | PJG           | PJG  | PJG           | PJG  |
| MSEA296               | NRG      | NRG      | NRG      | NRG      | PJG        | PJG                  | PJG      | PJG  | PJG  | NRG  | PJG  | PJG           | PJG  | PJG           | PJG  |
| MSEA297               | NRG      | NRG      | NRG      | NRG      | PJG        | PJG                  | PJG      | PJG  | PJG  | NRG  | PJG  | PJG           | PJG  | PJG           | PJG  |
| MSEA298               | NRG      | NRG      | NRG      | NRG      | PJG        | PJG                  | PJG      | PJG  | PJG  | NRG  | PJG  | PJG           | PJG  | PJG           | PJG  |
| MSEA299               | NRG      | NRG      | NRG      | NRG      | PJG        | PJG                  | PJG      | PJG  | PJG  | NRG  | PJG  | PJG           | PJG  | PJG           | PJG  |
| MSEA300               | NRG      | NRG      | NRG      | NRG      | PJG        | PJG                  | PJG      | PJG  | PJG  | NRG  | PJG  | PJG           | PJG  | PJG           | PJG  |
| MSEA178               | NRG      | NRG      | NRG      | NRG      | PJG        | PJG                  | PJG      | PJG  | PJG  | NRG  | PJG  | PJG           | PJG  | PJG           | PJG  |
| MSEA216               | NRG      | NRG      | NRG      | NRG      | PJG        | PJG                  | PJG      | PJG  | PJG  | NRG  | PJG  | PJG           | PJG  | PJG           | PJG  |
| MSEA220               | NRG      | NRG      | NRG      | NRG      | PJG        | PJG                  | PJG      | PJG  | PJG  | NRG  | PJG  | PJG           | PJG  | PJG           | PJG  |
| MSEA221               | NRG      | NRG      | NRG      | NRG      | PJG        | PJG                  | NRG      | PJG  | PJG  | NRG  | PJG  | PJG           | PJG  | PJG           | PJG  |
| MSEA222               | NRG      | NRG      | NRG      | NRG      | PJG        | PJG                  | PJG      | PJG  | PJG  | NRG  | PJG  | PJG           | PJG  | PJG           | PJG  |
| MSEA171               | NRG      | NRG      | NRG      | NRG      | PJG        | PJG                  | PJG      | PJG  | PJG  | NRG  | PJG  | PJG           | PJG  | PJG           | PJG  |
| MSEA180               | NRG      | NRG      | NRG      | NRG      | PJG        | PJG                  | PJG      | PJG  | PJG  | NRG  | PJG  | PJG           | PJG  | PJG           | PJG  |
| MSEA189               | NRG      | NRG      | NRG      | NRG      | PJG        | PJG                  | PJG      | PJG  | PJG  | NRG  | PJG  | PJG           | PJG  | PJG           | PJG  |
| MSEA190               | NRG      | NRG      | NRG      | NRG      | PJG        | PJG                  | PJG      | PJG  | PJG  | NRG  | PJG  | PJG           | PJG  | PJG           | PJG  |
| MSEA191               | NRG      | NRG      | NRG      | NRG      | PJG        | PJG                  | PJG      | PJG  | PJG  | NRG  | PJG  | PJG           | PJG  | PJG           | PJG  |
| MSEA192               | NRG      | NRG      | NRG      | NRG      | PJG        | PJG                  | PJG      | PJG  | PJG  | NRG  | PJG  | PJG           | PJG  | PJG           | PJG  |
| MSEA193               | NRG      | NRG      | NRG      | NRG      | PJG        | PJG                  | PJG      | PJG  | PJG  | NRG  | PJG  | PJG           | PJG  | PJG           | PJG  |
| MSEA194               | NRG      | NRG      | NRG      | NRG      | PJG        | PJG                  | PJG      | PJG  | PJG  | NRG  | PJG  | PJG           | PJG  | PJG           | PJG  |
| MSEA195               | NRG      | NRG      | NRG      | NRG      | PJG        | PJG                  | PJG      | PJG  | PJG  | NRG  | PJG  | PJG           | PJG  | PJG           | PJG  |
| MSEA196               | NRG      | NRG      | NRG      | NRG      | PJG        | PJG                  | PJG      | PJG  | PJG  | NRG  | PJG  | PJG           | PJG  | PJG           | PJG  |
| MSEA197               | NRG      | NRG      | NRG      | NRG      | PJG        | PJG                  | PJG      | PJG  | PJG  | NRG  | PJG  | PJG           | PJG  | PJG           | PJG  |
| MSEA198               | NRG      | NRG      | NRG      | NRG      | PJG        | PJG                  | PJG      | PJG  | PJG  | NRG  | PJG  | PJG           | PJG  | PJG           | PJG  |
| MSEA199               | NRG      | NRG      | NRG      | NRG      | PJG        | PJG                  | PJG      | PJG  | PJG  | NRG  | PJG  | PJG           | PJG  | PJG           | PJG  |
| MSEA200               | NRG      | NRG      | NRG      | NRG      | PJG        | PJG                  | PJG      | PJG  | PJG  | NRG  | PJG  | PJG           | PJG  | PJG           | PJG  |
| MSEA201               | NRG      | NRG      | NRG      | NRG      | PJG        | PJG                  | PJG      | PJG  | PJG  | NRG  | PJG  | PJG           | PJG  | PJG           | PJG  |
| MSEA202               | NRG      | NRG      | NRG      | NRG      | PJG        | PJG                  | PJG      | PJG  | PJG  | NRG  | PJG  | PJG           | PJG  | PJG           | PJG  |
| MSEA203               | NRG      | NRG      | NRG      | NRG      | PJG        | PJG                  | PJG      | PJG  | PJG  | NRG  | PJG  | PJG           | PJG  | PJG           | PJG  |
| MSEA204               | NRG      | NRG      | NRG      | NRG      | PJG        | PJG                  | PJG      | PJG  | PJG  | NRG  | PJG  | PJG           | PJG  | PJG           | PJG  |
| MSEA205               | NRG      | NRG      | NRG      | NRG      | PJG        | PJG                  | PJG      | PJG  | PJG  | NRG  | PJG  | PJG           | PJG  | PJG           | PJG  |
| MSEA206               | NRG      | NRG      | NRG      | NRG      | PJG        | PJG                  | PJG      | PJG  | PJG  | NRG  | PJG  | PJG           | PJG  | PJG           | PJG  |
| MSEA207               | NRG      | NRG      | NRG      | NRG      | PJG        | PJG                  | PJG      | PJG  | PJG  | NRG  | PJG  | PJG           | PJG  | PJG           | PJG  |
| MSEA208               | NRG      | NRG      | NRG      | NRG      | PJG        | PJG                  | PJG      | PJG  | PJG  | NRG  | PJG  | PJG           | PJG  | PJG           | PJG  |
| MSEA209               | NRG      | NRG      | NRG      | NRG      | PJG        | PJG                  | PJG      | PJG  | PJG  | NRG  | PJG  | PJG           | PJG  | PJG           | PJG  |
| MSEA210               | NRG      | NRG      | NRG      | NRG      | PJG        | PJG                  | PJG      | PJG  | PJG  | NRG  | PJG  | PJG           | PJG  | PJG           | PJG  |
| MSEA211               | NRG      | NRG      | NRG      | NRG      | PJG        | PJG                  | PJG      | PJG  | PJG  | NRG  | PJG  | PJG           | PJG  | PJG           | PJG  |
| MSEA212               | NRG      | NRG      | NRG      | NRG      | PJG        | PJG                  | PJG      | PJG  | PJG  | NRG  | PJG  | PJG           | PJG  | PJG           | PJG  |
| MSEA213               | NRG      | NRG      | NRG      | NRG      | PJG        | PJG                  | PJG      | PJG  | PJG  | NRG  | PJG  | PJG           | PJG  | PJG           | PJG  |
| MSEA214               | NRG      | NRG      | NRG      | NRG      | PJG        | PJG                  | PJG      | PJG  | PJG  | NRG  | PJG  | PJG           | PJG  | PJG           | PJG  |
| MSEA215               | NRG      | NRG      | NRG      | NRG      | PJG        | PJG                  | PJG      | PJG  | PJG  | NRG  | PJG  | PJG           | PJG  | PJG           | PJG  |
| MSEA216               | NRG      | NRG      | NRG      | NRG      | PJG        | PJG                  | PJG      | PJG  | PJG  | NRG  | PJG  | PJG           | PJG  | PJG           | PJG  |
| MSEA217               | NRG      | NRG      | NRG      | NRG      | PJG        | PJG                  | PJG      | PJG  | PJG  | NRG  | PJG  | PJG           | PJG  | PJG           | PJG  |
| MSEA218               | NRG      | NRG      | NRG      | NRG      | PJG        | PJG                  | PJG      | PJG  | PJG  | NRG  | PJG  | PJG           | PJG  | PJG           | PJG  |
| MSEA219               | NRG      | NRG      | NRG      | NRG      | PJG        | PJG                  | PJG      | PJG  | PJG  | NRG  | PJG  | PJG           | PJG  | PJG           | PJG  |
| MSEA220               | NRG      | NRG      | NRG      | NRG      | PJG        | PJG                  | PJG      | PJG  | PJG  | NRG  | PJG  | PJG           | PJG  | PJG           | PJG  |
| MSEA221               | NRG      | NRG      | NRG      | NRG      | PJG        | PJG                  | PJG      | PJG  | PJG  | NRG  | PJG  | PJG           | PJG  | PJG           | PJG  |
| MSEA222               | NRG      | NRG      | NRG      | NRG      | PJG        | PJG                  | PJG      | PJG  | PJG  | NRG  | PJG  | PJG           | PJG  | PJG           | PJG  |
| MSEA223               | NRG      | NRG      | NRG      | NRG      | PJG        | PJG                  | PJG      | PJG  | PJG  | NRG  | PJG  | PJG           | PJG  | PJG           | PJG  |
| MSEA224               | NRG      | NRG      | NRG      | NRG      | PJG        | PJG                  | PJG      | PJG  | PJG  | NRG  | PJG  | PJG           | PJG  | PJG           | PJG  |
| MSEA225               | NRG      | NRG      | NRG      | NRG      | PJG        | PJG                  | PJG      | PJG  | PJG  | NRG  | PJG  | PJG           | PJG  | PJG           | PJG  |
| MSEA226               | NRG      | NRG      | NRG      | NRG      | PJG        | PJG                  | PJG      | PJG  | PJG  | NRG  | PJG  | PJG           | PJG  | PJG           | PJG  |
| MSEA227               | NRG      | NRG      | NRG      | NRG      | PJG        | PJG                  | PJG      | PJG  | PJG  | NRG  | PJG  | PJG           | PJG  | PJG           | PJG  |
| MSEA228               | NRG      | NRG      | NRG      | NRG      | PJG        | PJG                  | PJG      | PJG  | PJG  | NRG  | PJG  | PJG           | PJG  | PJG           | PJG  |
| MSEA229               | NRG      | NRG      | NRG      | NRG      | PJG        | PJG                  | PJG      | PJG  | PJG  | NRG  | PJG  | PJG           | PJG  | PJG           | PJG  |
| MSEA230               | NRG      | NRG      | NRG      | NRG      | PJG        | PJG                  | PJG      | PJG  | PJG  | NRG  | PJG  | PJG           | PJG  | PJG           | PJG  |
| MSEA231               | NRG      | NRG      | NRG      | NRG      | PJG        | PJG                  | PJG      | PJG  | PJG  | NRG  | PJG  | PJG           | PJG  | PJG           | PJG  |
| MSEA232               | NRG      | NRG      | NRG      | NRG      | PJG        | PJG                  | PJG      | PJG  | PJG  | NRG  | PJG  | PJG           | PJG  | PJG           | PJG  |
| MSEA233               | NRG      | NRG      | NRG      | NRG      | PJG        | PJG                  | PJG      | PJG  | PJG  | NRG  | PJG  | PJG           | PJG  | PJG           | PJG  |
| MSEA234               | NRG      | NRG      | NRG      | NRG      | PJG        | PJG                  | PJG      | PJG  | PJG  | NRG  | PJG  | PJG           | PJG  | PJG           | PJG  |
| MSEA235               | NRG      | NRG      | NRG      | NRG      | PJG        | PJG                  | PJG      | PJG  | PJG  | NRG  | PJG  | PJG           | PJG  | PJG           | PJG  |
| MSEA236               | NRG      | NRG      | NRG      | NRG      | PJG        | PJG                  | PJG      | PJG  | PJG  | NRG  | PJG  | PJG           | PJG  | PJG           | PJG  |
| MSEA237               | NRG      | NRG      | NRG      | NRG      | PJG        | PJG                  | PJG      | PJG  | PJG  | NRG  | PJG  | PJG           | PJG  | PJG           | PJG  |
| MSEA238               | NRG      | NRG      | NRG      | NRG      | PJG        | PJG                  | PJG      | PJG  | PJG  | NRG  | PJG  | PJG           | PJG  | PJG           | PJG  |
| MSEA239               | NRG      | NRG      | NRG      | NRG      | PJG        | PJG                  | PJG      | PJG  | PJG  | NRG  | PJG  | PJG           | PJG  | PJG           | PJG  |
| MSEA240               | NRG      | NRG      | NRG      | NRG      | PJG        | PJG                  | PJG      | PJG  | PJG  | NRG  | PJG  | PJG           | PJG  | PJG           | PJG  |
| MSEA241               | NRG      | NRG      | NRG      | NRG      | PJG        | PJG                  | PJG      | PJG  | PJG  | NRG  | PJG  | PJG           | PJG  | PJG           | PJG  |
| MSEA242               | NRG      | NRG      | NRG      | NRG      | PJG        | PJG                  | PJG      | PJG  | PJG  | NRG  | PJG  | PJG           | PJG  | PJG           | PJG  |
| MSEA243               | NRG      | NRG      | NRG      | NRG      | PJG        | PJG                  | PJG      | PJG  | PJG  | NRG  | PJG  | PJG           | PJG  | PJG           | PJG  |
| MSEA244               | NRG      | NRG      | NRG      | NRG      | PJG        | PJG                  | PJG      | PJG  | PJG  | NRG  | PJG  | PJG           | PJG  | PJG           | PJG  |
| MSEA245               | NRG      | NRG      | NRG      | NRG      | PJG        | PJG                  | PJG      | PJG  | PJG  | NRG  | PJG  | PJG           | PJG  | PJG           | PJG  |
| MSEA246               | NRG      | NRG      | NRG      | NRG      | PJG        | PJG                  | PJG      | PJG  | PJG  | NRG  | PJG  | PJG           | PJG  | PJG           | PJG  |
| MSEA247               | NRG      | NRG      | NRG      | NRG      | PJG        | PJG                  | PJG      | PJG  | PJG  | NRG  | PJG  | PJG           | PJG  | PJG           | PJG  |
| MSEA248               | NRG      | NRG      | NRG      | NRG      | PJG        | PJG                  | PJG      | PJG  | PJG  | NRG  | PJG  | PJG           | PJG  | PJG           | PJG  |
| MSEA249               | NRG      | NRG      | NRG      | NRG      | PJG        | PJG                  | PJG      | PJG  | PJG  | NRG  | PJG  | PJG           | PJG  | PJG           | PJG  |
| MSEA250               | NRG      | NRG      | NRG      | NRG      | PJG        | PJG                  | PJG      | PJG  | PJG  | NRG  | PJG  | PJG           | PJG  | PJG           | PJG  |
| MSEA251               | NRG      | NRG      | NRG      | NRG      | PJG        | PJG                  | PJG      | PJG  | PJG  | NRG  | PJG  | PJG           | PJG  | PJG           | PJG  |
| MSEA252               | NRG      | NRG      | NRG      | NRG      | PJG        | PJG                  | PJG      | PJG  | PJG  | NRG  | PJG  | PJG           | PJG  | PJG           | PJG  |
| MSEA253               | NRG      | NRG      | NRG      | NRG      | PJG        | PJG                  | PJG      | PJG  | PJG  | NRG  | PJG  | PJG           | PJG  | PJG           | PJG  |
| MSEA254               | NRG      | NRG      | NRG      | NRG      | PJG        | PJG                  | PJG      | PJG  | PJG  | NRG  | PJG  | PJG           | PJG  | PJG           | PJG  |
| MSEA255               | NRG      | NRG      | NRG      | NRG      | PJG        | PJG                  | PJG      | PJG  | PJG  | NRG  | PJG  | PJG           | PJG  | PJG           | PJG  |
| MSEA256               | NRG      | NRG      | NRG      | NRG      | PJG        | PJG                  | PJG      | PJG  | PJG  | NRG  | PJG  | PJG           | PJG  | PJG           | PJG  |
| MSEA257               | NRG      | NRG      | NRG      | NRG      | PJG        | PJG                  | PJG      | PJG  | PJG  | NRG  | PJG  | PJG           | PJG  | PJG           | PJG  |
| MSEA258               | NRG      | NRG      | NRG      | NRG      | PJG        | PJG                  | PJG      | PJG  | PJG  | NRG  | PJG  | PJG           | PJG  | PJG           | PJG  |
| MSEA259               | NRG      | NRG      | NRG      | NRG      | PJG        | P                    |          |      |      |      |      |               |      |               |      |















| CAPSULE- AND BIOFILM-ASSOCIATED GENES |       |       |       |       |                   |                   |       |       |       |       |                   |                   |      |      |      |     |
|---------------------------------------|-------|-------|-------|-------|-------------------|-------------------|-------|-------|-------|-------|-------------------|-------------------|------|------|------|-----|
| Strain                                | capH1 | capJ1 | capK1 | capH5 | cap45<br>(gene 1) | cap45<br>(gene 2) | capK5 | capH8 | capI8 | capJ8 | capK8<br>(gene 1) | capK8<br>(gene 2) | icaA | icaC | icaD | bap |
| MSA1165                               | NEG   | NEG   | NEG   | NEG   | NEG               | NEG               | NEG   | POS   | POS   | POS   | POS               | POS               | POS  | POS  | POS  | NEG |
| MSA1167                               | NEG   | NEG   | NEG   | NEG   | NEG               | NEG               | NEG   | POS   | POS   | POS   | POS               | POS               | POS  | POS  | POS  | NEG |
| MSA1174                               | NEG   | NEG   | NEG   | NEG   | NEG               | NEG               | NEG   | POS   | POS   | POS   | POS               | POS               | POS  | POS  | POS  | NEG |
| MSA1184                               | NEG   | NEG   | NEG   | NEG   | NEG               | NEG               | NEG   | POS   | POS   | POS   | POS               | POS               | POS  | POS  | POS  | NEG |
| MSA1206                               | NEG   | NEG   | NEG   | NEG   | NEG               | NEG               | NEG   | POS   | POS   | POS   | POS               | POS               | POS  | POS  | POS  | NEG |
| MSA1209                               | NEG   | NEG   | NEG   | NEG   | NEG               | NEG               | NEG   | POS   | POS   | POS   | POS               | POS               | POS  | POS  | POS  | NEG |
| MSA1225                               | NEG   | NEG   | NEG   | NEG   | NEG               | NEG               | NEG   | POS   | POS   | POS   | POS               | POS               | POS  | POS  | POS  | NEG |
| MSA1226                               | NEG   | NEG   | NEG   | NEG   | NEG               | NEG               | NEG   | POS   | POS   | POS   | POS               | POS               | POS  | POS  | POS  | NEG |
| MSA1279                               | NEG   | AMB   | NEG   | NEG   | POS               | POS               | NEG   | POS   | AMB   | NEG   | NEG               | NEG               | POS  | POS  | POS  | POS |
| MSA1278                               | NEG   | NEG   | NEG   | NEG   | POS               | POS               | POS   | NEG   | NEG   | NEG   | NEG               | NEG               | POS  | POS  | POS  | POS |
| MSA1280                               | NEG   | NEG   | NEG   | NEG   | POS               | POS               | POS   | NEG   | NEG   | NEG   | NEG               | NEG               | POS  | POS  | POS  | NEG |
| MSA1281                               | NEG   | NEG   | NEG   | NEG   | POS               | POS               | POS   | NEG   | NEG   | NEG   | NEG               | NEG               | POS  | POS  | POS  | NEG |
| MSA1282                               | NEG   | NEG   | NEG   | NEG   | POS               | POS               | POS   | NEG   | NEG   | NEG   | NEG               | NEG               | POS  | POS  | POS  | NEG |
| MSA1283                               | NEG   | NEG   | NEG   | NEG   | POS               | POS               | POS   | NEG   | NEG   | NEG   | NEG               | NEG               | POS  | POS  | POS  | NEG |
| MSA1284                               | NEG   | NEG   | NEG   | NEG   | POS               | POS               | POS   | NEG   | NEG   | NEG   | NEG               | NEG               | POS  | POS  | POS  | NEG |
| MSA1285                               | NEG   | NEG   | NEG   | NEG   | POS               | POS               | POS   | NEG   | NEG   | NEG   | NEG               | NEG               | POS  | POS  | POS  | NEG |
| MSA1286                               | NEG   | NEG   | NEG   | NEG   | POS               | POS               | POS   | NEG   | NEG   | NEG   | NEG               | NEG               | POS  | POS  | POS  | NEG |
| MSA1287                               | NEG   | NEG   | NEG   | NEG   | POS               | POS               | POS   | NEG   | NEG   | NEG   | NEG               | NEG               | POS  | POS  | POS  | NEG |
| MSA1288                               | NEG   | NEG   | NEG   | NEG   | POS               | POS               | POS   | NEG   | NEG   | NEG   | NEG               | NEG               | POS  | POS  | POS  | NEG |
| MSA1289                               | NEG   | NEG   | NEG   | NEG   | POS               | POS               | POS   | NEG   | NEG   | NEG   | NEG               | NEG               | POS  | POS  | POS  | NEG |
| MSA1290                               | NEG   | NEG   | NEG   | NEG   | POS               | POS               | POS   | NEG   | NEG   | NEG   | NEG               | NEG               | POS  | POS  | POS  | NEG |
| MSA1291                               | NEG   | NEG   | NEG   | NEG   | POS               | POS               | POS   | NEG   | NEG   | NEG   | NEG               | NEG               | POS  | POS  | POS  | NEG |
| MSA1292                               | NEG   | NEG   | NEG   | NEG   | POS               | POS               | POS   | NEG   | NEG   | NEG   | NEG               | NEG               | POS  | POS  | POS  | NEG |
| MSA1293                               | NEG   | NEG   | NEG   | NEG   | POS               | POS               | POS   | NEG   | NEG   | NEG   | NEG               | NEG               | POS  | POS  | POS  | NEG |
| MSA1294                               | NEG   | NEG   | NEG   | NEG   | POS               | POS               | POS   | NEG   | NEG   | NEG   | NEG               | NEG               | POS  | POS  | POS  | NEG |
| MSA1295                               | NEG   | NEG   | NEG   | NEG   | POS               | POS               | POS   | NEG   | NEG   | NEG   | NEG               | NEG               | POS  | POS  | POS  | NEG |
| MSA1296                               | NEG   | NEG   | NEG   | NEG   | POS               | POS               | POS   | NEG   | NEG   | NEG   | NEG               | NEG               | POS  | POS  | POS  | NEG |
| MSA1297                               | NEG   | NEG   | NEG   | NEG   | POS               | POS               | POS   | NEG   | NEG   | NEG   | NEG               | NEG               | POS  | POS  | POS  | NEG |
| MSA1298                               | NEG   | NEG   | NEG   | NEG   | POS               | POS               | POS   | NEG   | NEG   | NEG   | NEG               | NEG               | POS  | POS  | POS  | NEG |
| MSA1299                               | NEG   | NEG   | NEG   | NEG   | POS               | POS               | POS   | NEG   | NEG   | NEG   | NEG               | NEG               | POS  | POS  | POS  | NEG |
| MSA1300                               | NEG   | NEG   | NEG   | NEG   | POS               | POS               | POS   | NEG   | NEG   | NEG   | NEG               | NEG               | POS  | POS  | POS  | NEG |
| MSA1301                               | NEG   | NEG   | NEG   | NEG   | POS               | POS               | POS   | NEG   | NEG   | NEG   | NEG               | NEG               | POS  | POS  | POS  | NEG |
| MSA1302                               | NEG   | NEG   | NEG   | NEG   | POS               | POS               | POS   | NEG   | NEG   | NEG   | NEG               | NEG               | POS  | POS  | POS  | NEG |
| MSA1303                               | NEG   | NEG   | NEG   | NEG   | POS               | POS               | POS   | NEG   | NEG   | NEG   | NEG               | NEG               | POS  | POS  | POS  | NEG |
| MSA1304                               | NEG   | NEG   | NEG   | NEG   | POS               | POS               | POS   | NEG   | NEG   | NEG   | NEG               | NEG               | POS  | POS  | POS  | NEG |
| MSA1305                               | NEG   | NEG   |       |       |                   |                   |       |       |       |       |                   |                   |      |      |      |     |

| CAPSULE- AND BIOTIN-ASSOCIATED GENES |       |       |       |       |                |                |       |       |       |       |                |                |      |      |      |     |
|--------------------------------------|-------|-------|-------|-------|----------------|----------------|-------|-------|-------|-------|----------------|----------------|------|------|------|-----|
| Strain                               | capH1 | capJ1 | capK1 | capH5 | capL5 (gene 1) | capL5 (gene 2) | capK5 | capH8 | capB8 | capJ8 | capK8 (gene 1) | capK8 (gene 2) | icaA | icaC | icaD | hop |
| MSA170                               | NRG   | NRG   | NRG   | NRG   | NRG            | NRG            | NRG   | POS   | POS   | POS   | POS            | POS            | POS  | POS  | POS  | NRG |
| MSA176                               | NRG   | NRG   | NRG   | NRG   | NRG            | NRG            | NRG   | POS   | POS   | POS   | POS            | POS            | POS  | POS  | POS  | NRG |
| MSA179                               | NRG   | NRG   | NRG   | NRG   | NRG            | NRG            | NRG   | POS   | POS   | POS   | POS            | POS            | POS  | POS  | POS  | NRG |
| MSA180                               | NRG   | NRG   | NRG   | NRG   | NRG            | NRG            | NRG   | POS   | POS   | POS   | POS            | POS            | POS  | POS  | POS  | NRG |
| MSA186                               | NRG   | NRG   | NRG   | NRG   | NRG            | NRG            | NRG   | POS   | POS   | POS   | POS            | POS            | POS  | POS  | POS  | NRG |
| MSA190                               | NRG   | NRG   | NRG   | NRG   | NRG            | NRG            | NRG   | POS   | POS   | POS   | POS            | POS            | POS  | POS  | POS  | NRG |
| MSA196                               | NRG   | NRG   | NRG   | NRG   | NRG            | NRG            | NRG   | POS   | POS   | POS   | POS            | POS            | POS  | POS  | POS  | NRG |
| MSA199                               | NRG   | NRG   | NRG   | NRG   | NRG            | NRG            | NRG   | POS   | POS   | POS   | POS            | POS            | POS  | POS  | POS  | NRG |
| MSA201                               | NRG   | NRG   | NRG   | NRG   | NRG            | NRG            | NRG   | POS   | POS   | POS   | POS            | POS            | POS  | POS  | POS  | NRG |
| MSA202                               | NRG   | NRG   | NRG   | NRG   | NRG            | NRG            | NRG   | POS   | POS   | POS   | POS            | POS            | POS  | POS  | POS  | NRG |
| MSA209                               | NRG   | NRG   | NRG   | NRG   | NRG            | NRG            | NRG   | POS   | POS   | POS   | POS            | POS            | POS  | POS  | POS  | NRG |
| MSA210                               | NRG   | NRG   | NRG   | NRG   | NRG            | NRG            | NRG   | POS   | POS   | POS   | POS            | POS            | POS  | POS  | POS  | NRG |
| MSA211                               | NRG   | NRG   | NRG   | NRG   | NRG            | NRG            | NRG   | POS   | POS   | POS   | POS            | POS            | POS  | POS  | POS  | NRG |
| MSA212                               | NRG   | NRG   | NRG   | NRG   | NRG            | NRG            | NRG   | POS   | POS   | POS   | POS            | POS            | POS  | POS  | POS  | NRG |
| MSA213                               | NRG   | NRG   | NRG   | NRG   | NRG            | NRG            | NRG   | POS   | POS   | POS   | POS            | POS            | POS  | POS  | POS  | NRG |
| MSA214                               | NRG   | NRG   | NRG   | NRG   | NRG            | NRG            | NRG   | POS   | POS   | POS   | POS            | POS            | POS  | POS  | POS  | NRG |
| MSA215                               | NRG   | NRG   | NRG   | NRG   | NRG            | NRG            | NRG   | POS   | POS   | POS   | POS            | POS            | POS  | POS  | POS  | NRG |
| MSA216                               | NRG   | NRG   | NRG   | NRG   | NRG            | NRG            | NRG   | POS   | POS   | POS   | POS            | POS            | POS  | POS  | POS  | NRG |
| MSA217                               | NRG   | NRG   | NRG   | NRG   | NRG            | NRG            | NRG   | POS   | POS   | POS   | POS            | POS            | POS  | POS  | POS  | NRG |
| MSA218                               | NRG   | NRG   | NRG   | NRG   | NRG            | NRG            | NRG   | POS   | POS   | POS   | POS            | POS            | POS  | POS  | POS  | NRG |
| MSA219                               | NRG   | NRG   | NRG   | NRG   | NRG            | NRG            | NRG   | POS   | POS   | POS   | POS            | POS            | POS  | POS  | POS  | NRG |
| MSA220                               | NRG   | NRG   | NRG   | NRG   | NRG            | NRG            | NRG   | POS   | POS   | POS   | POS            | POS            | POS  | POS  | POS  | NRG |
| MSA221                               | NRG   | NRG   | NRG   | NRG   | NRG            | NRG            | NRG   | POS   | POS   | POS   | POS            | POS            | POS  | POS  | POS  | NRG |
| MSA222                               | NRG   | NRG   | NRG   | NRG   | NRG            | NRG            | NRG   | POS   | POS   | POS   | POS            | POS            | POS  | POS  | POS  | NRG |
| MSA223                               | NRG   | NRG   | NRG   | NRG   | NRG            | NRG            | NRG   | POS   | POS   | POS   | POS            | POS            | POS  | POS  | POS  | NRG |
| MSA224                               | NRG   | NRG   | NRG   | NRG   | NRG            | NRG            | NRG   | POS   | POS   | POS   | POS            | POS            | POS  | POS  | POS  | NRG |
| MSA225                               | NRG   | NRG   | NRG   | NRG   | NRG            | NRG            | NRG   | POS   | POS   | POS   | POS            | POS            | POS  | POS  | POS  | NRG |
| MSA226                               | NRG   | NRG   | NRG   | NRG   | NRG            | NRG            | NRG   | POS   | POS   | POS   | POS            | POS            | POS  | POS  | POS  | NRG |
| MSA227                               | NRG   | NRG   | NRG   | NRG   | NRG            | NRG            | NRG   | POS   | POS   | POS   | POS            | POS            | POS  | POS  | POS  | NRG |
| MSA228                               | NRG   | NRG   | NRG   | NRG   | NRG            | NRG            | NRG   | POS   | POS   | POS   | POS            | POS            | POS  | POS  | POS  | NRG |
| MSA229                               | NRG   | NRG   | NRG   | NRG   | NRG            | NRG            | NRG   | POS   | POS   | POS   | POS            | POS            | POS  | POS  | POS  | NRG |
| MSA230                               | NRG   | NRG   | NRG   | NRG   | NRG            | NRG            | NRG   | POS   | POS   | POS   | POS            | POS            | POS  | POS  | POS  | NRG |
| MSA231                               | NRG   | NRG   | NRG   | NRG   | NRG            | NRG            | NRG   | POS   | POS   | POS   | POS            | POS</          |      |      |      |     |





[illegible]
