# Supplementary material for: Microarray-Based Genotyping and Clinical Outcomes of Staphylococcus aureus Bloodstream Infection: An Exploratory Study
Source: PubMed Central journal article supplement (PMC3743874; doi:10.1371/journal.pone.0071259), 2013-08-14
Supplement: pone.0071259.s001.pdf [file pone.0071259.s001.pdf]

## Supplemental file S1

Patient characteristics and demographic data of all SAB patients within the INvasive STapylococcus aureus INfections CohorT (INSTINCT) and the subgroup of SAB cases included in this study.

| Parameter                                                                           | All SAB cases within INSTINCT<br>n=779 | SAB cases included<br>n=317 |
|-------------------------------------------------------------------------------------|----------------------------------------|-----------------------------|
| <b>Male</b>                                                                         | 519 (66.6%)                            | 220 (69.4%)                 |
| <b>Age (median)</b>                                                                 | 66 yrs                                 | 65 yrs                      |
| <b>Underlying condition</b>                                                         |                                        |                             |
| Malignancy (hematologic and solid tumor)                                            | 244 (31.3%)                            | 92 (29.0%)                  |
| Diabetes mellitus                                                                   | 177 (22.7%)                            | 73 (23.0%)                  |
| Endstage renal disease                                                              | 81 (10.4%)                             | 34 (10.7%)                  |
| Intravenous drug abuse                                                              | 27 (3.5%)                              | 13 (4.1%)                   |
| HIV-infection                                                                       | 10 (1.3%)                              | 5 (1.6%)                    |
| <b>Severity of illness</b>                                                          |                                        |                             |
| McCabe non-fatal                                                                    | 451 (57.9%)                            | 200 (63.1%)                 |
| McCabe ultimately fatal                                                             | 288 (37.0%)                            | 106 (33.4%)                 |
| McCabe rapidly fatal                                                                | 40 (5.1%)                              | 11 (3.5%)                   |
| <b>Mode of acquisition</b>                                                          |                                        |                             |
| Community-acquired                                                                  | 125 (16.0%)                            | 84 (26.5%)                  |
| Community-onset healthcare-associated                                               | 246 (31.6%)                            | 77 (24.3%)                  |
| Hospital-acquired                                                                   | 408 (52.4%)                            | 156 (49.2%)                 |
| <b>MRSA</b>                                                                         | 81 (10.4%)                             | 31 (9.8%)                   |
| <b>Source of bacteremia/primary focus</b>                                           |                                        |                             |
| Unknown                                                                             | 165 (21.2%)                            | 35 (11.0%)                  |
| Intravascular catheter/device-related                                               | 254 (32.6%)                            | 141 (44.5%)                 |
| Osteoarticular infection (osteomyelitis, vertebral osteomyelitis, septic arthritis) | 98 (12.6%)                             | 50 (15.8%)                  |
| Others                                                                              | 262 (33.6%)                            | 91 (28.7%)                  |
| <b>Infective endocarditis</b>                                                       | 81 (10.4%)                             | 35 (11.0%)                  |
| <b>Severe sepsis or septic shock</b>                                                | 124+104 (29.3%)                        | 102 (32.2%)                 |
| <b>Disseminated disease</b>                                                         | 181 (23.2%)                            | 79 (24.9%)                  |
| <b>All-cause mortality at day 30 §</b>                                              | 142 (18.2%)                            | 58 (18.4%)                  |
| <b>Late recurrence</b>                                                              | 52 (6.7%)                              | 21 (6.6%)                   |

Total numbers of SAB cases within the study period were 805, of which 779 (97%) were evaluated within the INSTINCT study (419/422 in study center A, 360/383 in study center B). 293 isolates were available in the study center A, of which every second isolate (147 isolates) was included in the study. 340 isolates were available in study center B, of which 170 isolates were included in the study.

§ Three patients were lost to follow-up.
