# Supplementary material for: Microarray-Based Genotyping and Clinical Outcomes of Staphylococcus aureus Bloodstream Infection: An Exploratory Study
Source: PubMed Central journal article supplement (PMC3743874; doi:10.1371/journal.pone.0071259), 2013-08-14
Supplement: pone.0071259.s003.pdf [file pone.0071259.s003.pdf]

### Supplemental file S3

Distribution of clonal complexes and *spa* types in 317 patients with SAB

| Clonal complex | total<br>n=317 | Number of different <i>spa</i> types | Most common <i>spa</i> types (number) §  |
|----------------|----------------|--------------------------------------|------------------------------------------|
| CC5            | 50             | 17                                   | t003 (20), t002 (13), t045 and t062 (2)  |
| CC45           | 46             | 29                                   | t015 (14), t050, t230, t331 and t630 (2) |
| CC30           | 39             | 24                                   | t012 (13), t021 (3), t153 (2)            |
| CC15           | 28             | 14                                   | t084 (11), t346 (3), t254 and t360 (2)   |
| CC7            | 27             | 4                                    | t091 (23), t1943 (2)                     |
| CC8            | 24             | 11                                   | t008 (11), t024 (2), t068 and t6395 (2)  |
| CC22           | 22             | 8                                    | t005 (8), t608 (5), t032 (4)             |
| CC101          | 13             | 5                                    | t056 (9)                                 |
| CC12           | 10             | 4                                    | t160 (6), t156 (2)                       |
| CC1            | 8              | 4                                    | t127 (5)                                 |
| CC121          | 6              | 6                                    |                                          |
| CC25           | 6              | 6                                    |                                          |
| CC59           | 6              | 3                                    | t216 (4)                                 |
| CC9            | 6              | 2                                    | t100 (4), t209 (2)                       |
| CC97           | 6              | 4                                    | t359 (2), t3051 (2)                      |
| CC398          | 4              | 4                                    |                                          |
| CC20           | 2              | 2                                    |                                          |

CC78, CC80, CC182, CC395 were found as single isolates. Ten isolates could not be assigned to a clonal complex, one isolate could not be *spa* typed.

§ Single *spa* types are not shown.
